# Supplementary material
Source: PubMed Central journal article supplement (PMC4440923)
Supplement: supp_dev.115568_DEV115568supp.pdf [file supp_dev.115568_DEV115568supp.pdf]

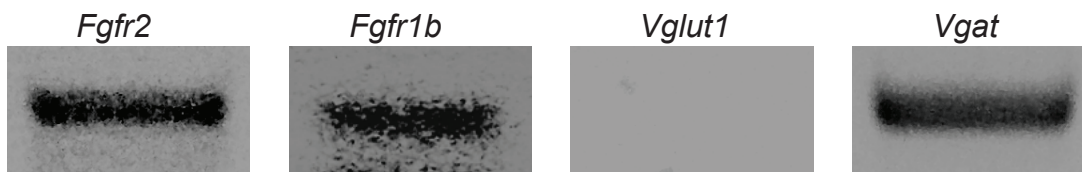

**Figure S1. Expression of *Fgfr2* and *Fgfr1b* in CA3 interneurons.** Interneurons were isolated using fluorescence-activated cell sorting from the CA3 area dissected from P14 *Vgat-Venus* mice (Wang et al., 2009), followed by mRNA isolation and cDNA synthesis. PCR amplification using specific primers demonstrates the presence of *Fgfr2*, *Fgfr1b*, and *Slc32a1* (*Vgat*) transcripts, but not *Slc17a7* (*Vglut1*) transcripts, in the CA3 interneurons.

**Wang, Y., Kakizaki, T., Sakagami, H., Saito, K., Ebihara, S., Kato, M., Hirabayashi, M., Saito, Y., Furuya, N., and Yanagawa, Y.** (2009) Fluorescent labeling of both GABAergic and glycinergic neurons in vesicular GABA transporter (VGAT)-Venus transgenic mouse. *Neuroscience* **164**, 1031-1043.

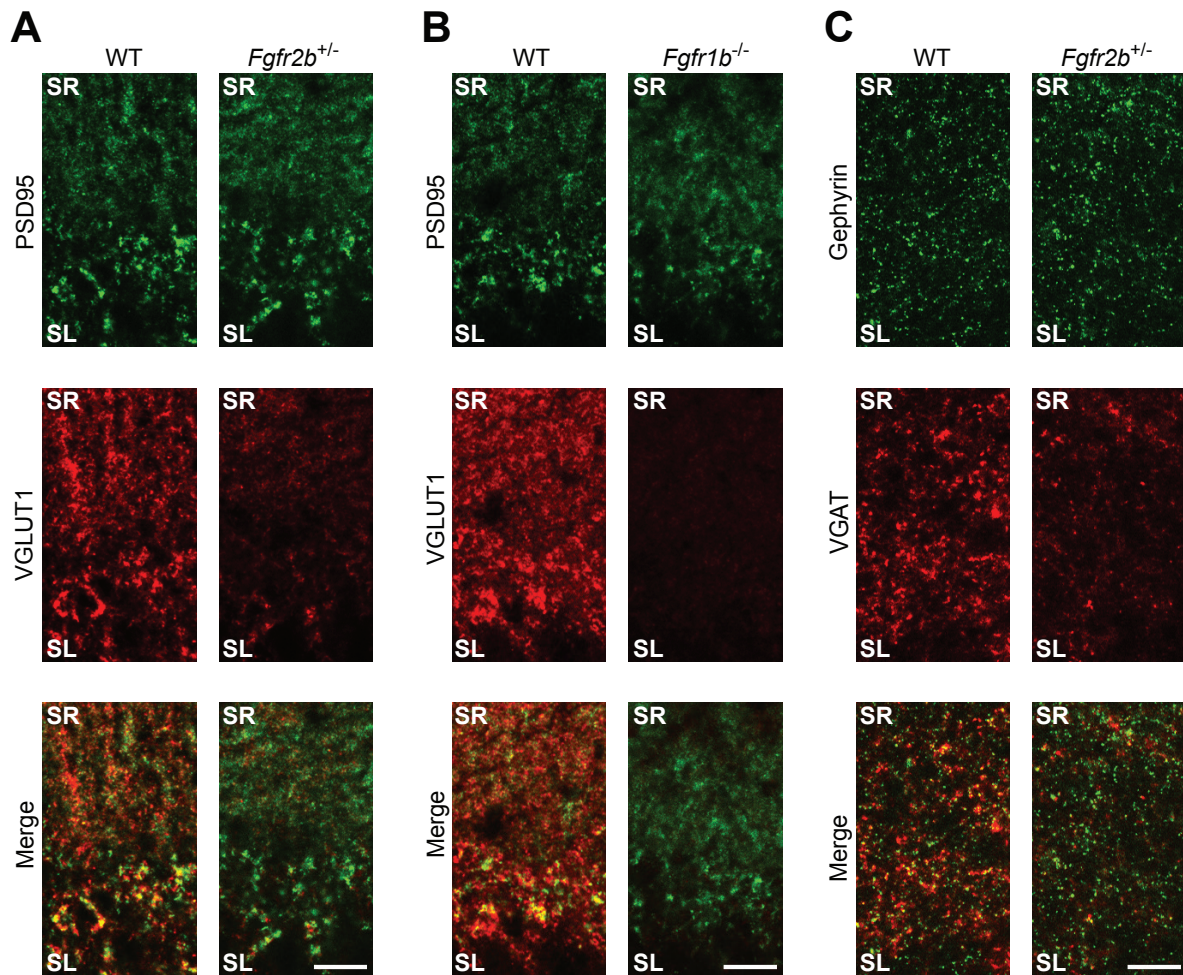

**Figure S2. Postsynaptic differentiation is not affected by *Fgfr* deletion.** (A) Representative images showing that *Fgfr2b*<sup>+/-</sup> mice at P8 do not exhibit changes in the clustering of PSD95, a postsynaptic scaffolding protein at excitatory synapses, despite a decrease in VGLUT1 signal. (B) Representative images showing that *Fgfr1b*<sup>-/-</sup> mice at P8 do not exhibit changes in PSD95 clustering, despite decreased VGLUT1 signal. (C) Representative images showing that *Fgfr2b*<sup>+/-</sup> mice do not exhibit changes in the clustering of gephyrin, a postsynaptic scaffolding protein at inhibitory synapses, despite decreased VGAT signal. Scale bars, 15  $\mu$ m.

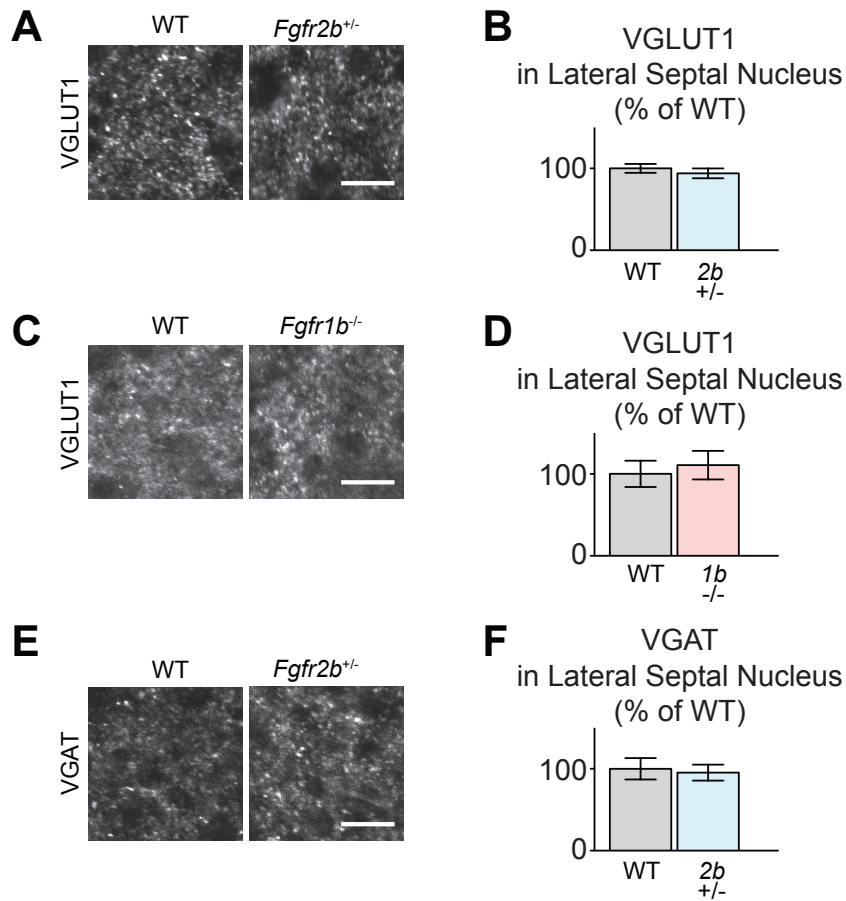

**Figure S3. Presynaptic differentiation is not impaired in lateral septal nuclei of *Fgfr*-KO mice.** (A-B) *Fgfr2b*<sup>+/-</sup> mice at P8 have no change in the VGLUT1 staining intensity in the lateral septal nucleus: (A) representative images, (B) quantification of intensity normalized to WT littermates. (C-D) *Fgfr1b*<sup>-/-</sup> mice at P8 have no change in the VGLUT1 staining intensity in the lateral septal nucleus: (C) representative images, (D) quantification of intensity normalized to WT littermates. (E-F) *Fgfr2b*<sup>+/-</sup> mice at P8 have no change in the VGAT staining intensity in the lateral septal nucleus: (E) representative images, (F) quantification of intensity normalized to WT littermates. Data represents mean ± s.e.m. Scale bars, 15 μm.

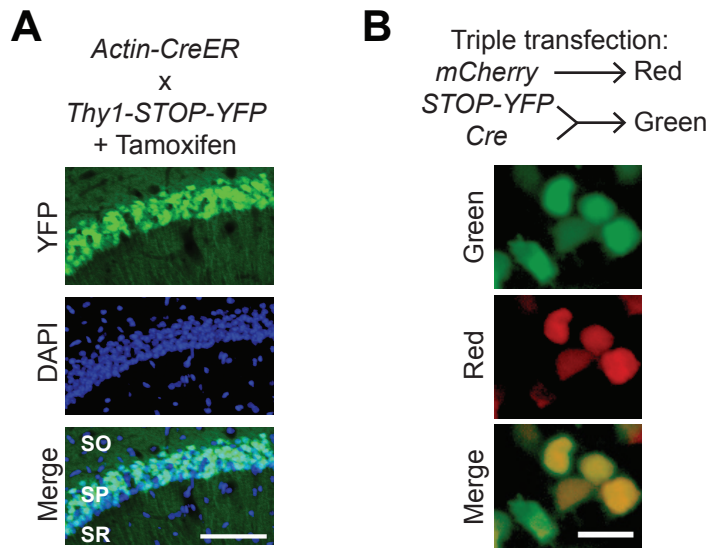

**Figure S4. Demonstration of efficient Cre-mediated excision of floxed genes *in vivo* and *in vitro*.** (A) Mice carrying the tamoxifen-sensitive Cre (CreER) under a CAG promoter (human CMV virus enhancer and chicken  $\beta$ -actin promoter) (*Actin-CreER*; Guo et al., 2002) were crossed with mice carrying EYFP preceded by a loxP-flanked STOP sequence under a Thy1 promoter (*Thy1-STOP-YFP*; Buffelli et al., 2003). Tamoxifen was injected at P0, activating CreER and leading to expression of EYFP in neurons, with an efficiency of >85%. Representative image of CA1 pyramidal neurons. SO – stratum oriens; SP – stratum pyramidale; SR – stratum radiatum. Scale bar, 100  $\mu$ m. (B) A Cre expression plasmid was co-transfected with a *loxP-STOP-loxP-YFP* plasmid and an *mCherry* plasmid into HEK cells using calcium-phosphate transfection method. >90% of transfected cells (red) showed Cre-mediated excision of the STOP cassette (green). Scale bar, 50  $\mu$ m.

**Buffelli, M., Burgess, R. W., Feng, G., Lobe, C. G., Lichtman, J. W., and Sanes, J. R.** (2003) Genetic evidence that relative synaptic efficacy biases the outcome of synaptic competition. *Nature* **424**, 430-434.

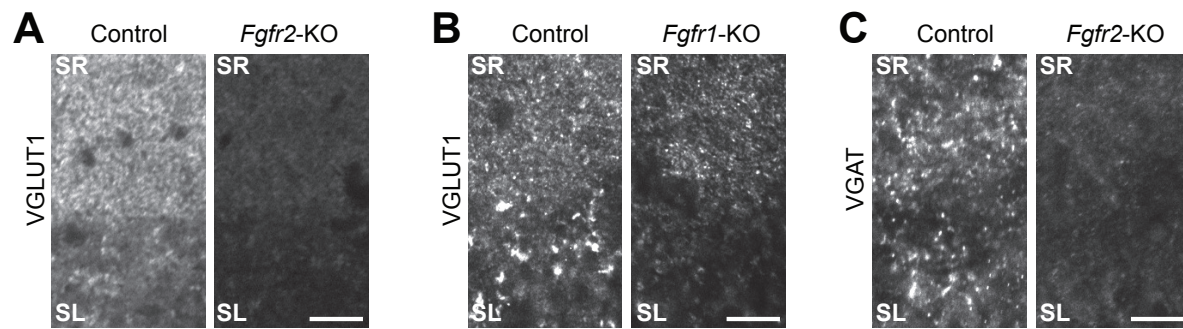

**Figure S5. Presynaptic defects persist in the hippocampus of *Fgfr*-KO mice at P14.**

(A) Representative images showing that defects in VGLUT1 clustering persist at P14 in *Fgfr2*-KO mice. (B) Representative images showing that defects in VGLUT1 clustering persist at P14 in *Fgfr1*-KO mice. (C) Representative images showing that defects in VGAT clustering persist at P14 in *Fgfr2*-KO mice. Scale bars, 15  $\mu$ m.

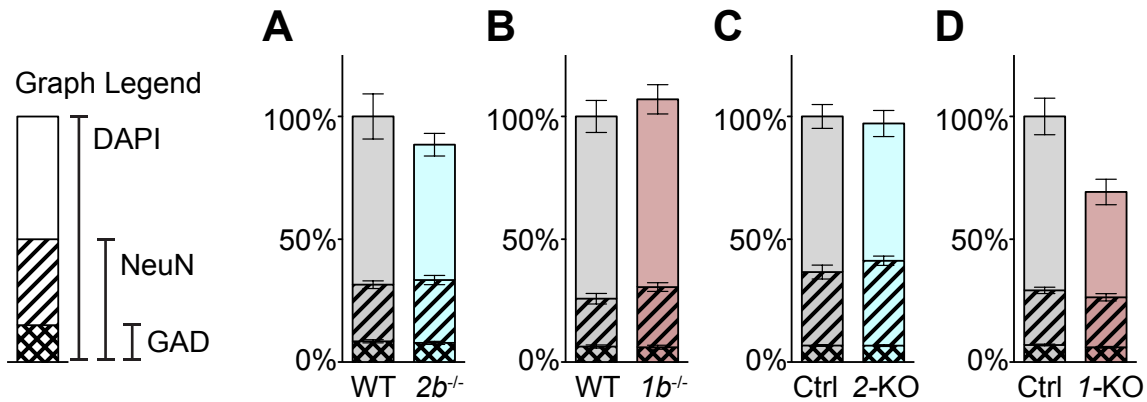

**Figure S6. Cell numbers and fates of cultured hippocampal neurons *in vitro*.** Cultured hippocampal neurons from WT and *Fgfr2b<sup>-</sup>* mice (A), WT and *Fgfr1b<sup>-</sup>* mice (B), Control and *Fgfr2*-KO mice (C), and Control and *Fgfr1*-KO mice (D) were stained with DAPI to count total cell number, NeuN (1:500, Millipore) to detect mature neurons, and GAD65/67 (1:500, Millipore) to detect inhibitory neurons. Cells were counted from 15 fields (A, B) or 12 fields (C, D) per genotype, each from 3 experiments. No significant changes in the number of total cells, total neurons, or inhibitory neurons were detected between *Fgfr2b<sup>-</sup>*, *Fgfr1b<sup>-</sup>*, or *Fgfr2*-KO cultures and their respective controls (A, B, C). A significant ( $p < 0.01$ ) decrease in the total number of cells, but not total number of neurons or inhibitory neurons, in *Fgfr1*-KO cultures compared to control (D). Cell counts for each set of experiments were normalized to WT or Ctrl DAPI count.



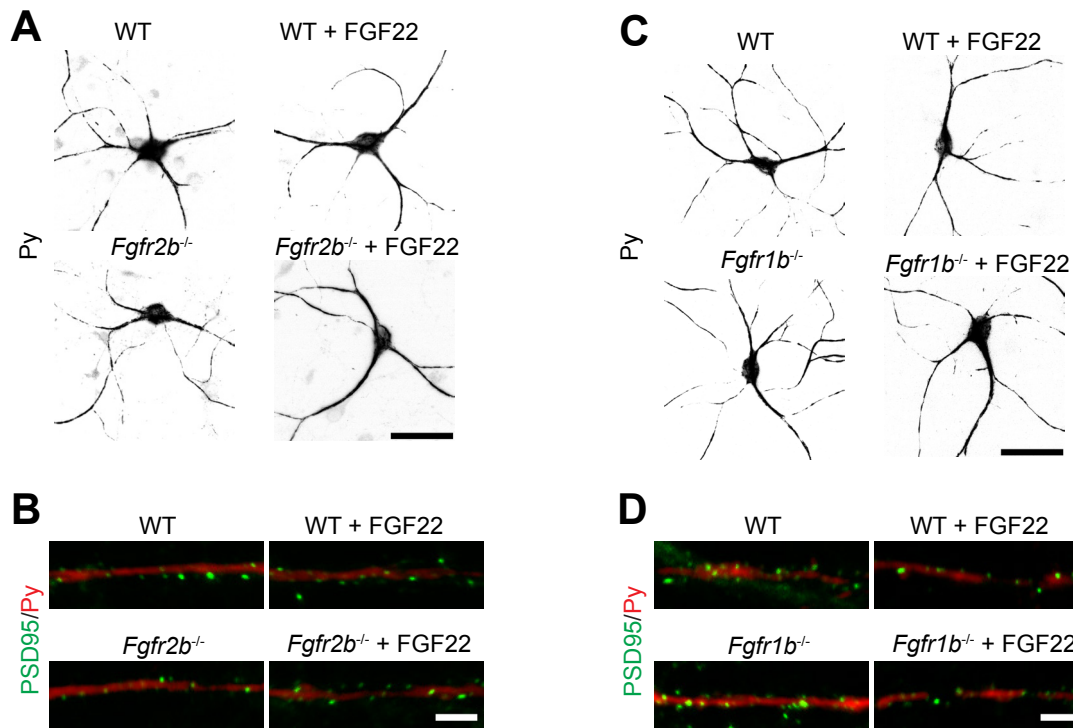

**Figure S7. Loss of *Fgfr2b* or *Fgfr1b* as well as application of FGF22 do not lead to apparent changes in dendritic morphology or excitatory postsynaptic differentiation of CA3 neurons.** (A) Representative images of WT and *Fgfr2b*<sup>-/-</sup> neurons with and without FGF22 treatment exhibit similar dendritic morphology, as observed by Py staining in culture. (B) WT and *Fgfr2b*<sup>-/-</sup> neurons with and without FGF22 treatment do not demonstrate changes in PSD95 (1:500, NeuroMab) staining on Py-positive dendrites. (C) Representative images of WT and *Fgfr1b*<sup>-/-</sup> neurons with and without FGF22 treatment exhibit similar dendritic morphology, as observed by Py staining in culture. (D) WT and *Fgfr1b*<sup>-/-</sup> neurons with and without FGF22 treatment do not demonstrate changes in PSD95 staining on Py-positive dendrites. Scale bars in (A, C) are 50  $\mu$ m. Scale bars in (B, D) are 5  $\mu$ m.

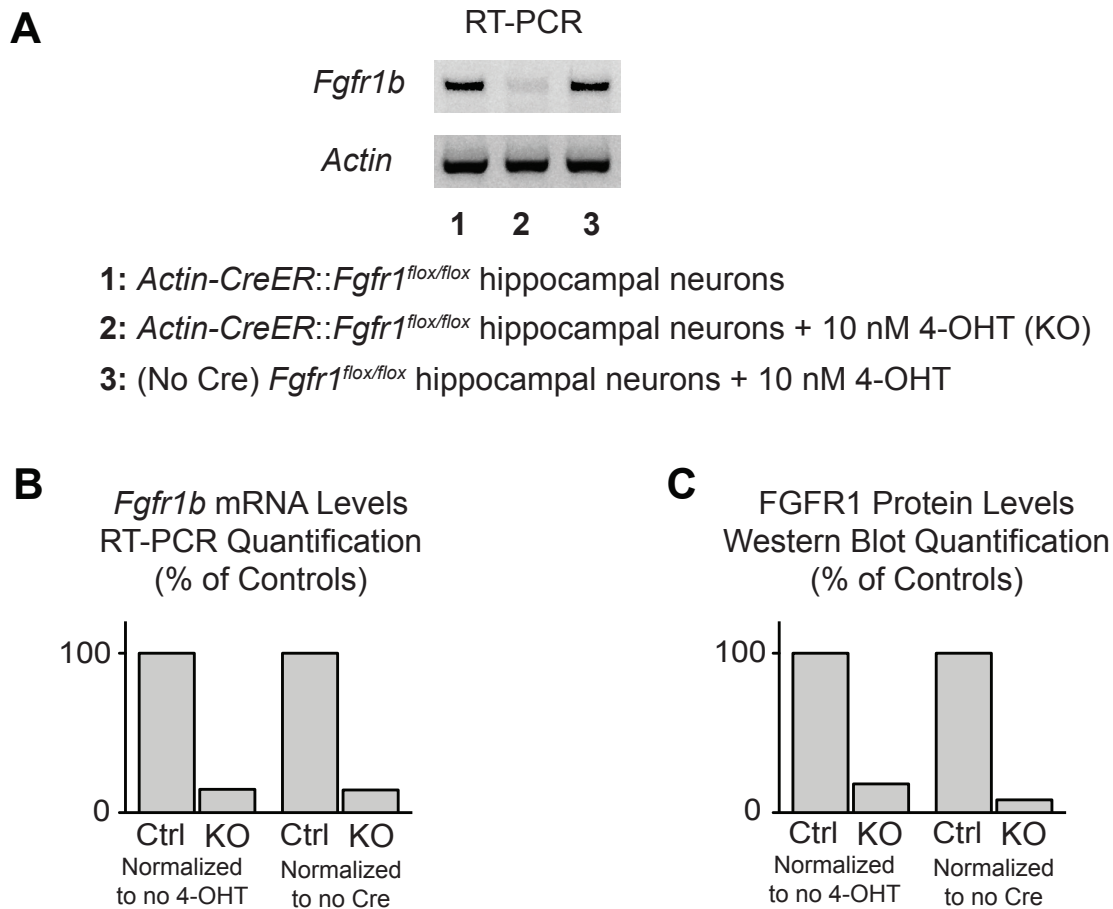

**Figure S8. Efficient inactivation of floxed *Fgfr* genes by 4-OH tamoxifen treatment *in vitro*.** Hippocampal neuron cultures were prepared from *Actin-CreER::Fgfr1<sup>fllox/fllox</sup>* and *Fgfr1<sup>fllox/fllox</sup>* (no Cre) littermates. Cultures were treated with 10 nM 4-OH tamoxifen (4-OHT). (A) mRNA was isolated and cDNA synthesized from *Actin-CreER::Fgfr1<sup>fllox/fllox</sup>* not treated with 4-OHT (no 4-OHT control), *Actin-CreER::Fgfr1<sup>fllox/fllox</sup>* treated with 10 nM 4-OHT at DIV1 (KO), and *Fgfr1<sup>fllox/fllox</sup>* treated with 10 nM 4-OHT (no Cre control). RT-PCR using primers specific for *Fgfr1b* revealed a stark decrease in *Fgfr1b* transcripts in KO neurons. (B) Quantification of *Fgfr1b* mRNA levels in KO neurons relative to no 4-OHT and no Cre controls. (C) Quantification of FGFR1 protein levels. KO neurons had a pronounced decrease in the amount of FGFR1 protein compared to no 4-OHT and no Cre controls. Protein lysate was prepared from cultured hippocampal neurons using 50 mM Tris-HCl, 150 mM NaCl, 1% NP-40 lysis buffer supplemented with Protease Inhibitor Cocktail (Roche). Western blot for FGFR1 was performed with the anti-FGFR1 antibody (1:100, Sigma, Cat# F5421). The intensity of FGFR1 bands was quantified with ImageJ.



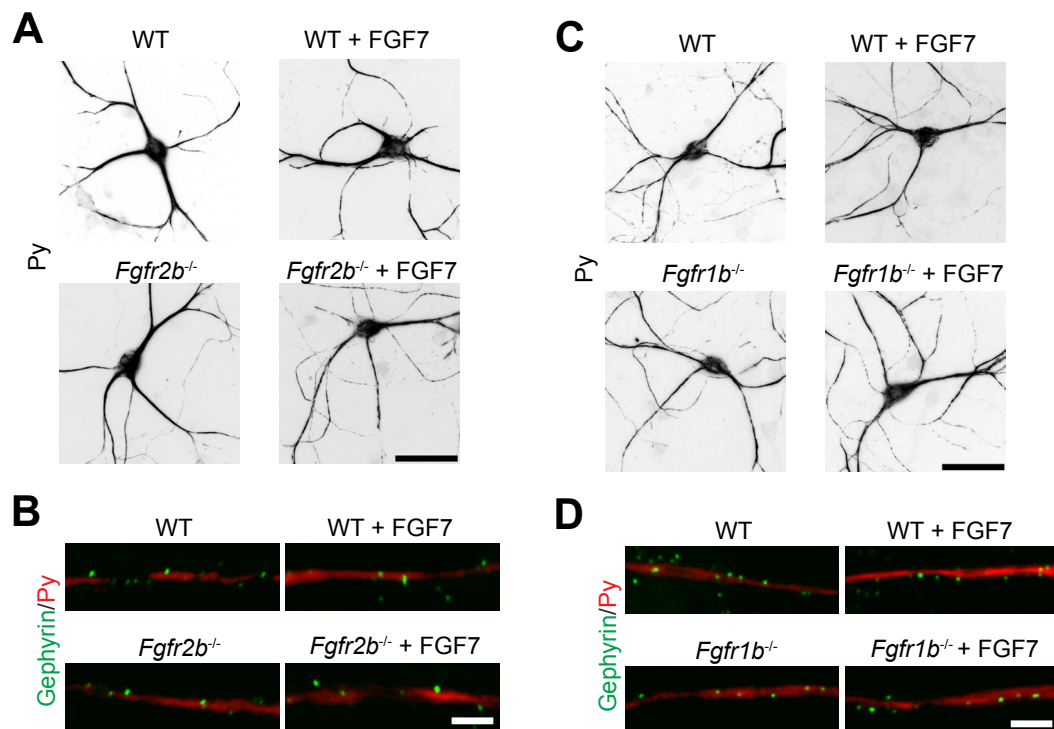

**Figure S9. Loss of FGFR2b or FGFR1b as well as application of FGF7 do not lead to apparent changes in dendritic morphology or inhibitory postsynaptic differentiation of CA3 neurons.** (A) Representative images of WT and *Fgfr2b*<sup>-/-</sup> neurons with and without FGF7 treatment exhibit similar dendritic morphology, as observed by Py staining in culture. (B) WT and *Fgfr2b*<sup>-/-</sup> neurons with and without FGF7 treatment do not demonstrate changes in Gephyrin (1:50, Synaptic Systems) staining on Py-positive dendrites. (C) Representative images of WT and *Fgfr1b*<sup>-/-</sup> neurons with and without FGF7 treatment exhibit similar dendritic morphology, as observed by Py staining in culture. (D) WT and *Fgfr1b*<sup>-/-</sup> neurons with and without FGF7 treatment do not demonstrate changes in Gephyrin staining on Py-positive dendrites. Scale bars in (A, C) are 50 μm. Scale bars in (B, D) are 5 μm.

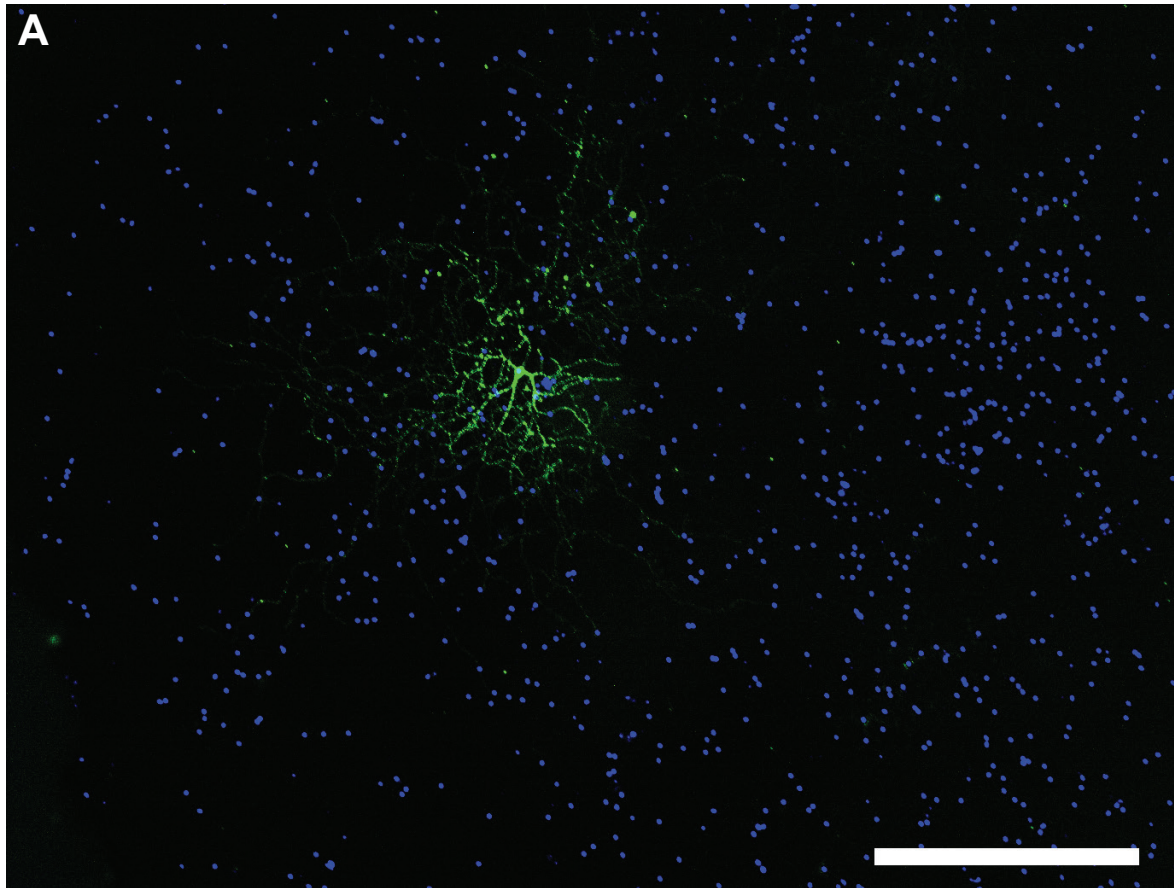

**Figure S10. Sparse transfection of synaptophysin-YFP into hippocampal culture.**

A) Representative image of a transfected neuron, with punctate synaptophysin-YFP fluorescent labeling (green) of the entire axonal arbor. DAPI (blue) reveals the presence of other untransfected cells. To isolate the effect of transfection for a cell-autonomous effect and minimize the effect of other transfected cells, sparse transfections were performed in experiments described in Figs 9-10. The expression plasmid carrying synaptophysin-YFP under the CMV promoter, together with experimental plasmids (such as Cre expression or empty vector), were transfected into neuronal cultures. Of the approximately 50,000 cells plated on a 12-mm coverslip (113 mm<sup>2</sup>), only about 50 cells were transfected per coverslip, thus there were fewer than 0.5 transfected cells per mm<sup>2</sup>. Only transfected neurons not contacting other transfected cells were analyzed, to maximize the possibility of cell-autonomous effects. Scale bar, 500  $\mu$ m.

B) Example image of a synaptophysin-YFP transfected astrocyte. Most transfected cells were neurons and not astrocytes (less than 5% of transfected cells were astrocytes).

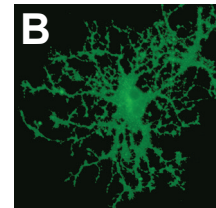

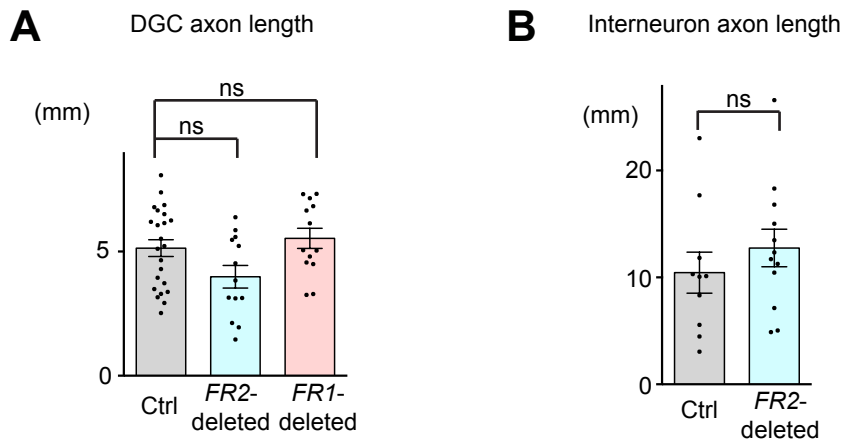

**Figure S11. Axon length does not significantly change in *Fgfr*-deleted DGCs or interneurons.** (A) Average axon length in *Fgfr2*-deleted or *Fgfr1*-deleted DGCs does not significantly change from control. (B) Average axon length in *Fgfr2*-deleted interneurons does not significantly change from control. Data represents mean  $\pm$  s.e.m. DGC axon lengths were compared using a One-way ANOVA with a post hoc Tukey's test. Interneuron axon lengths were compared using a Student's t-test. "ns", not significant.
